# Supplementary material for: A thiadiazolopyridine-functionalized Zr(iv)-based metal–organic framework for enhanced photocatalytic synthesis of tetrahydroquinolines under visible light
Source: Royal Society of Chemistry journal article supplement (doi:10.1039/d1ra07363j), 2022-01-01
Supplement: d1ra07363j1.pdf [file d1ra07363j1.pdf]

Electronic Supplementary Information (ESI) for

**A Thiadiazolopyridine-Functionalized Zr(IV)-Based Metal-Organic  
Framework for Enhanced Photocatalytic Synthesis of  
Tetrahydroquinolines under Visible Light**

Changyun Li,<sup>1†</sup> He Zhang,<sup>1†</sup> Xuefei Wang,<sup>1</sup> Qiu-Yan Li,<sup>1\*</sup> Xinsheng Zhao<sup>2</sup> and  
Xiao-Jun Wang<sup>1\*</sup>

<sup>1</sup>*Jiangsu Key Laboratory of Green Synthetic Chemistry for Functional Materials, School of  
Chemistry and Materials Science, Jiangsu Normal University, Xuzhou 221116, P. R. China*

<sup>2</sup>*School of Physics and Electronic Engineering, Jiangsu Normal University, Xuzhou 221116, P. R.  
China.*

E-mail: qyli@jsnu.edu.cn; xjwang@jsnu.edu.cn

<sup>†</sup>These authors have contributed equally to this work.

## General method and materials

Unless specifically mentioned, all chemicals are commercially available and were used as received. NMR spectra were taken on a Bruker AV400 at room temperature. The powder X-ray diffraction (PXRD) measurements were taken on a Bruker D8 diffractometer using Cu- $K_{\alpha}$  radiation ( $\lambda = 1.5418 \text{ \AA}$ ) at room temperature. Low-pressure gas sorption measurements were performed by using Quantachrome Instruments Autosorb-iQ (Boynton Beach, Florida USA) with the extra-high pure gases. The infrared spectra were recorded on a Thermo Scientific Nicolet iS10 FT-IR spectrometer as KBr pellets. Thermal gravimetric analyses (TGA) were performed on a TA-Q50 thermoanalyzer thermogravimetric analyzer in nitrogen atmosphere from  $45 \text{ }^{\circ}\text{C}$  to  $800 \text{ }^{\circ}\text{C}$  at the rate of  $10 \text{ }^{\circ}\text{C min}^{-1}$ .

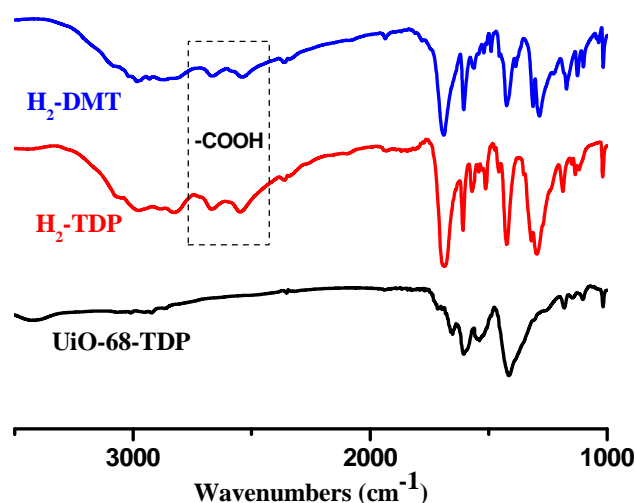

**Fig. S1** The FT-IR comparison of H<sub>2</sub>-DMT, H<sub>2</sub>-TDP ligands and MOF UiO-68-TDP, the disappearance of peak COOH at  $2500 \text{ cm}^{-1}$  in MOF indicative of the coordination of carboxylic acid with  $\text{Zr}^{4+}$ .

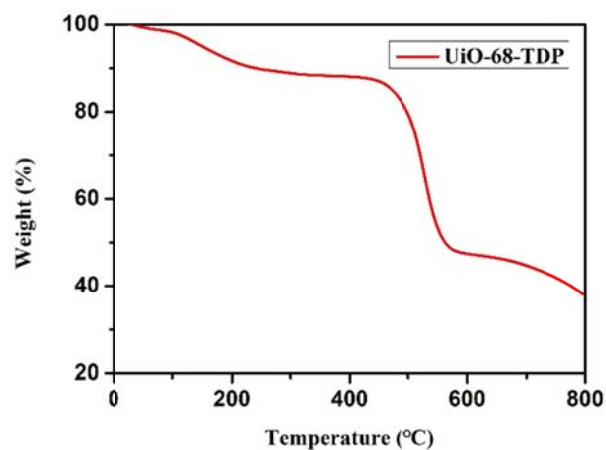

**Fig. S2** TGA of UiO-68-TDP under N<sub>2</sub> atmosphere with a heating rate of 10 °C/min, suggesting it can be stable as high as ~500 °C.

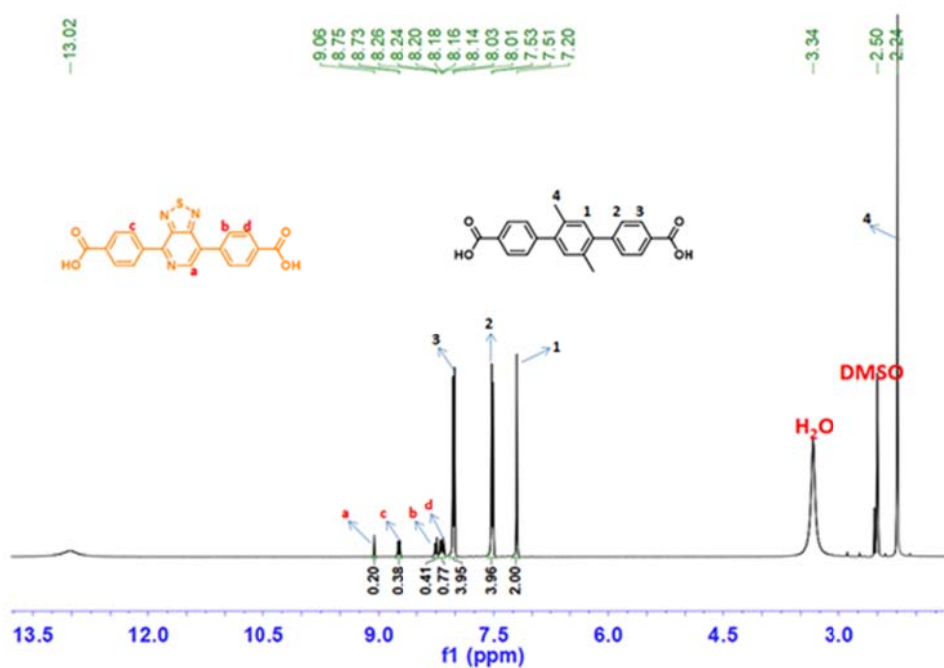

**Fig.S3** <sup>1</sup>H NMR of digested UiO-68-TDP in DMSO-*d*<sub>6</sub>. The ratio of linkers H<sub>2</sub>TDP and H<sub>2</sub>DMT in as-prepared MOF UiO-68-TDP was calculated from the integration of Ha (H<sub>2</sub>TDP) and H1 (H<sub>2</sub>DMT), giving the ratio of 1:5, which is slightly lower the initial ratio of 1:3 in preparation of MOF. The low content of H<sub>2</sub>-TDP linker in MOF should be ascribed to its lower solubility in comparison to H<sub>2</sub>-DMT.

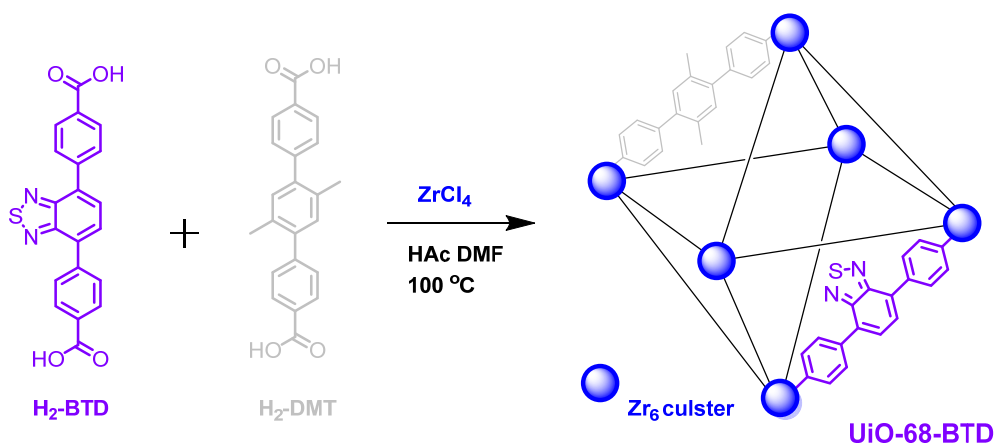

**Fig. S4** The preparation for MOF UiO-68-BTD composed by the mixed linkers of H<sub>2</sub>-BTD and H<sub>2</sub>-DMT, which was prepared according to our previous work (*Acta Chim. Sinica* 2017, 75, 80-85).

#### General Procedure for Photocatalysis

The weighed various photocatalysts (including MOF UiO-68-TDP, UiO-68-BTD, organic linkers, ZrCl<sub>4</sub> and others) *N,N*-dimethylanilines (0.2 mmol) and maleimides (0.1 mmol) were added into CH<sub>3</sub>CN (1 mL). The reaction mixture with stirring was irradiated by blue LEDs for 12 hours under air at room temperature. After that, 0.1 mmol 1-methyl-2,4-dinitrobenzene as an internal standard was added into the mixture and stirred at room temperature for 10 min in dark. Then, the reaction mixture was extracted by dichloromethane (20 mL). The organic layer was dried over Na<sub>2</sub>SO<sub>4</sub> and evaporated for subsequent <sup>1</sup>H NMR analysis to determine the yield by integration of H<sub>A</sub> from internal standard and H<sub>B</sub> from product (as shown in below.)

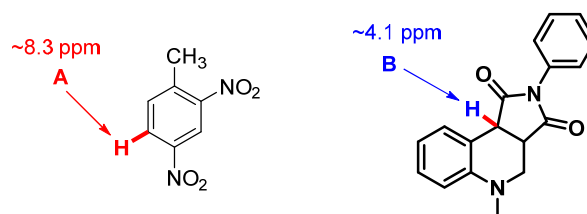

**Table S1.** Screening of the photocatalytic reaction conditions of **1a** and **2a** under other conditions.<sup>a</sup>

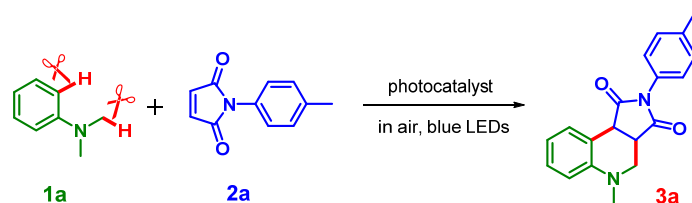

| Entry | Conditions                | Light | Solvent            | Yield <sup>b</sup> |
|-------|---------------------------|-------|--------------------|--------------------|
| 1     | UiO-68-TDP, 4 mg          | +     | DMF                | 64%                |
| 2     | UiO-68-TDP, 4 mg          | +     | THF                | 30%                |
| 3     | UiO-68-TDP, 4 mg          | +     | DCM                | 28%                |
| 4     | ZrCl <sub>4</sub> , 4 mg  | +     | CH <sub>3</sub> CN | 12%                |
| 5     | H <sub>2</sub> -TDP, 4 mg | +     | DMF                | 66%                |
| 6     | H <sub>2</sub> -DMT, 4 mg | +     | DMF                | 16%                |

<sup>a</sup>Reaction conditions: **1a** (0.2 mmol), **2a** (0.1 mmol) in solvent (1 mL) under an air atmosphere at room temperature for 12 h, blue LEDs ( $\lambda_{\text{max}} = 450 \text{ nm}$ , 3 W). <sup>b</sup>Yield was determined by <sup>1</sup>H-NMR analysis based on **2a**.

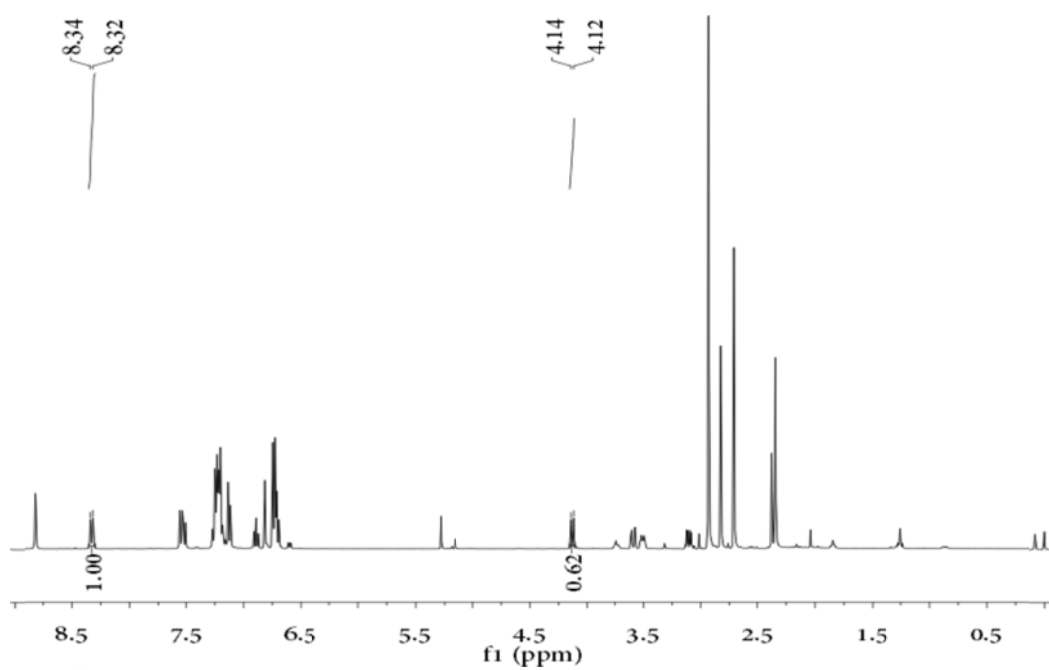

Fig. S5 <sup>1</sup>H NMR (Entry 1, Table 1).

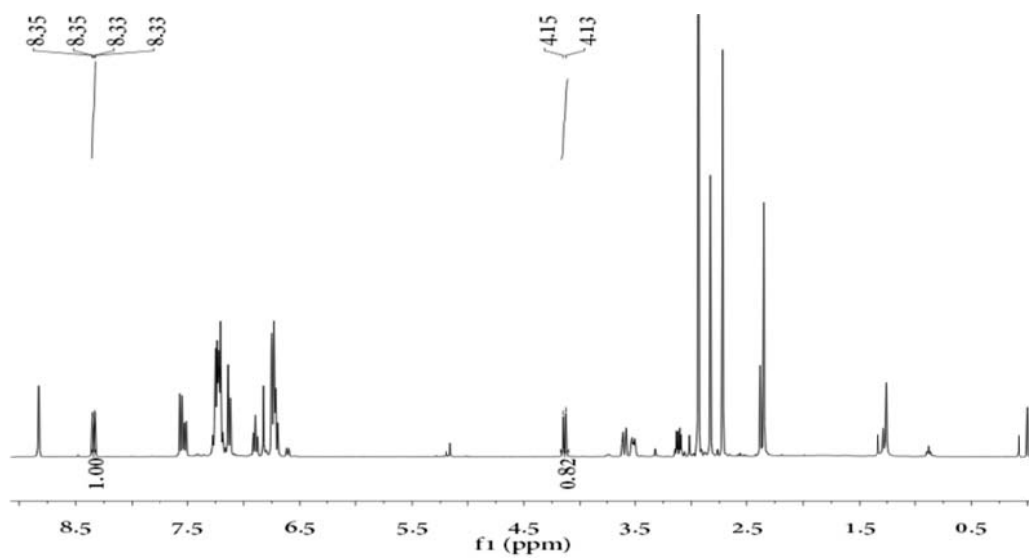

Fig. S6 <sup>1</sup>H NMR (Entry 2, Table 1).

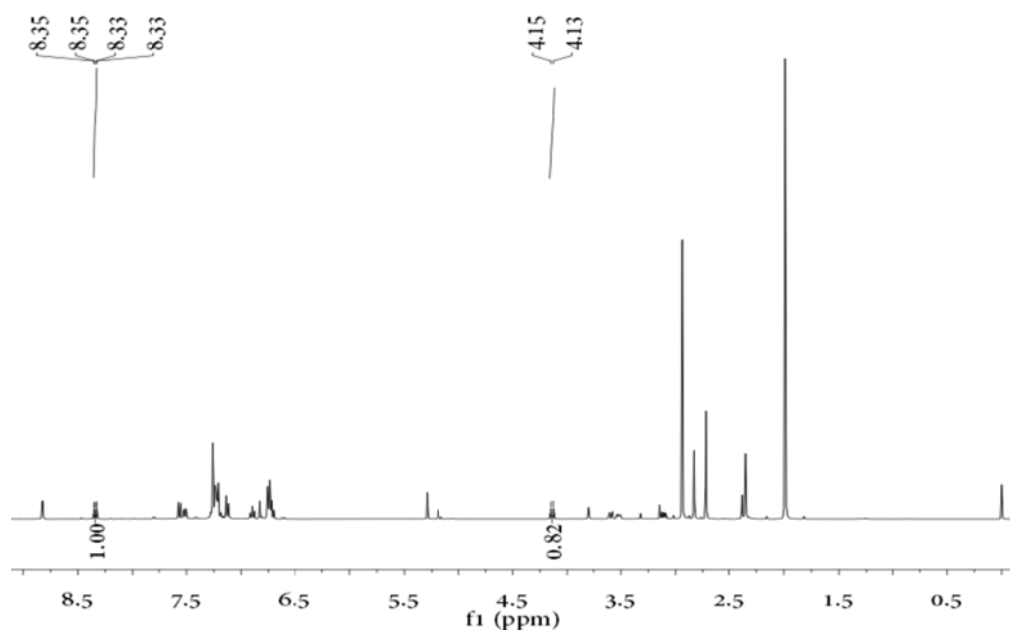

**Fig. S7**  $^1\text{H}$  NMR (Entry 3, Table 1).

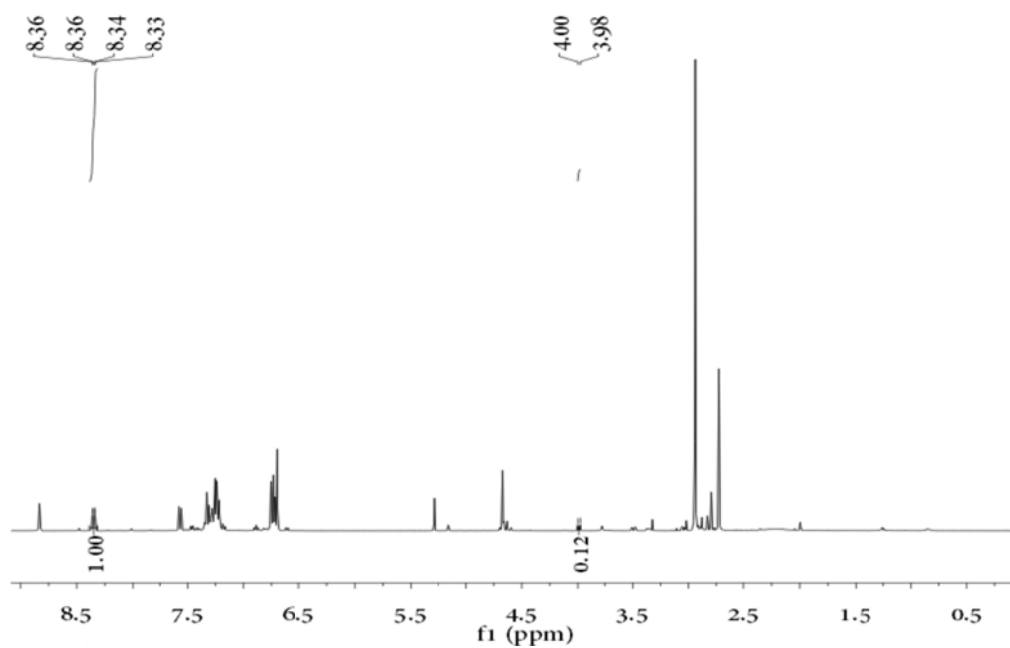

**Fig. S8**  $^1\text{H}$  NMR (Entry 4, Table 1).

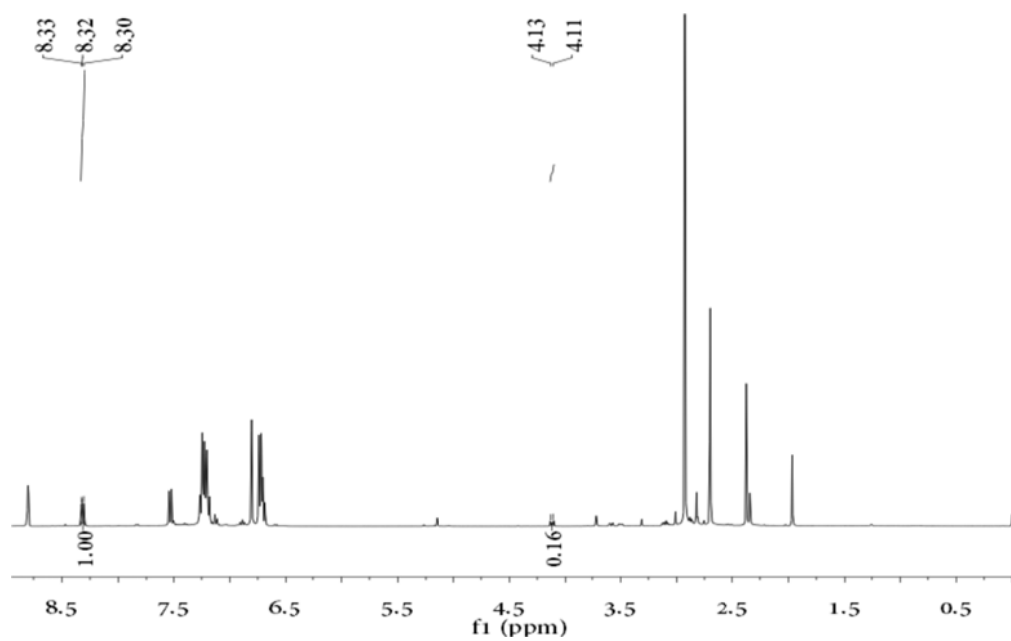

Fig. S9 <sup>1</sup>H NMR (Entry 5, Table 1).

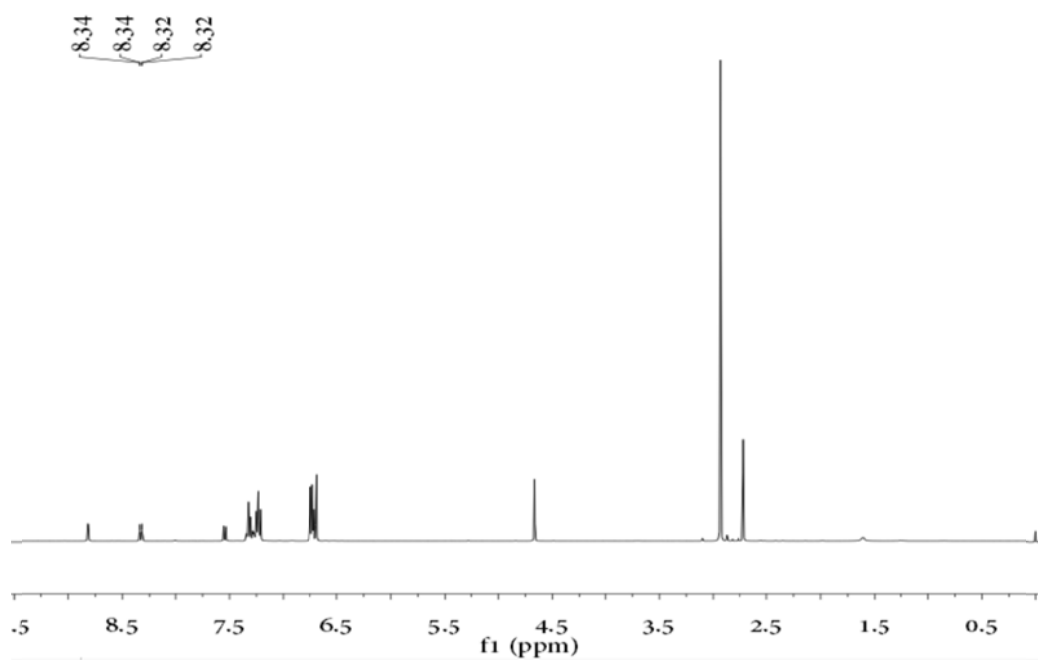

Fig. S10 <sup>1</sup>H NMR (Entry 6, Table 1).



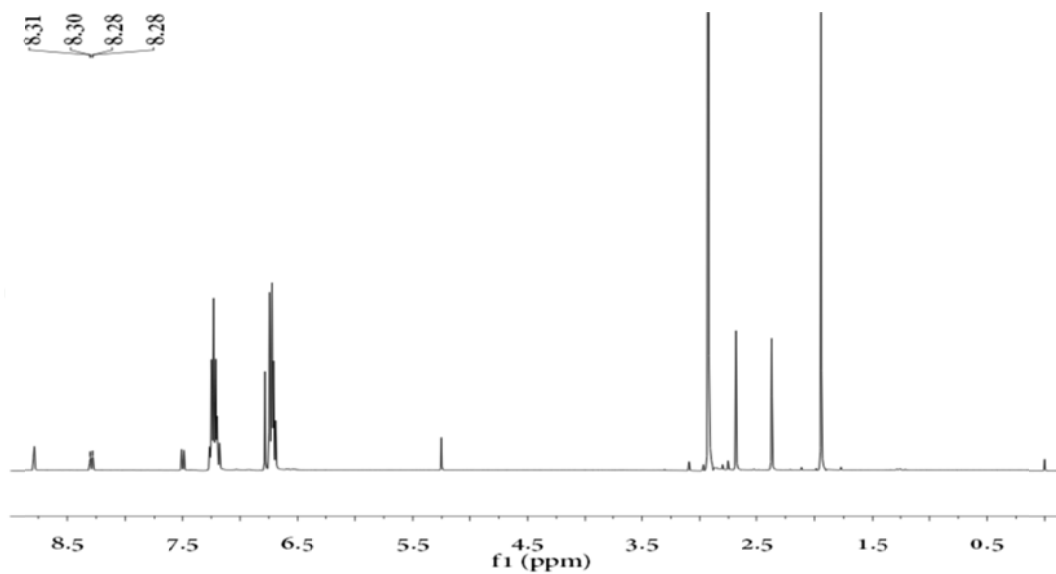

**Fig. S11**  $^1\text{H}$  NMR (Entry 7, Table 1).

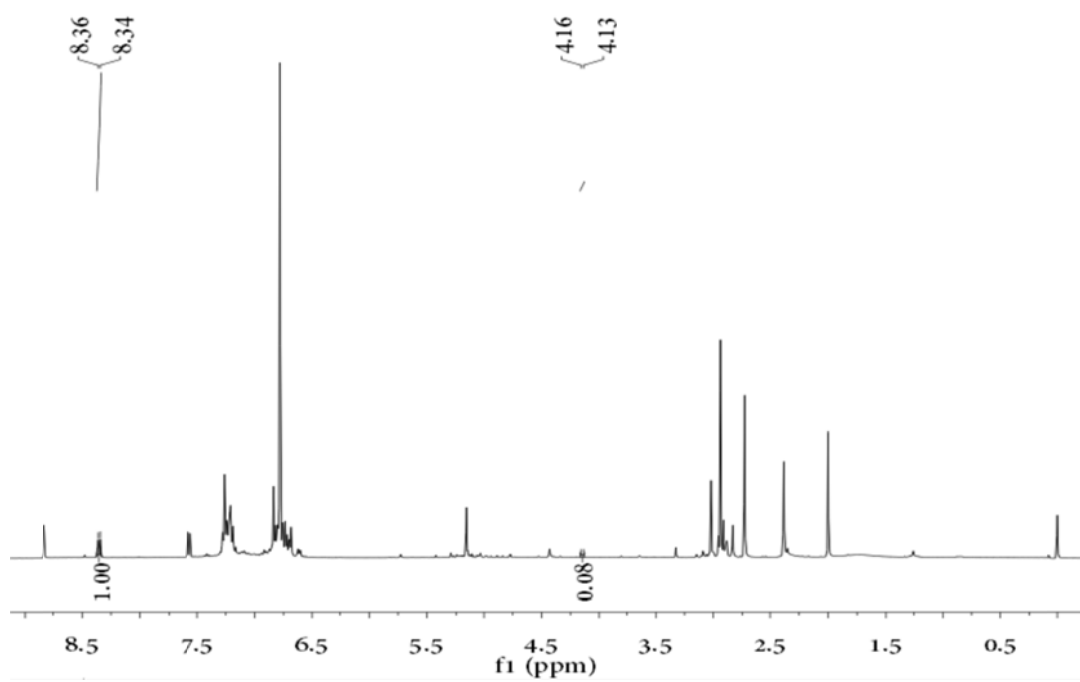

**Fig. S12**  $^1\text{H}$  NMR (Entry 8, Table 1).

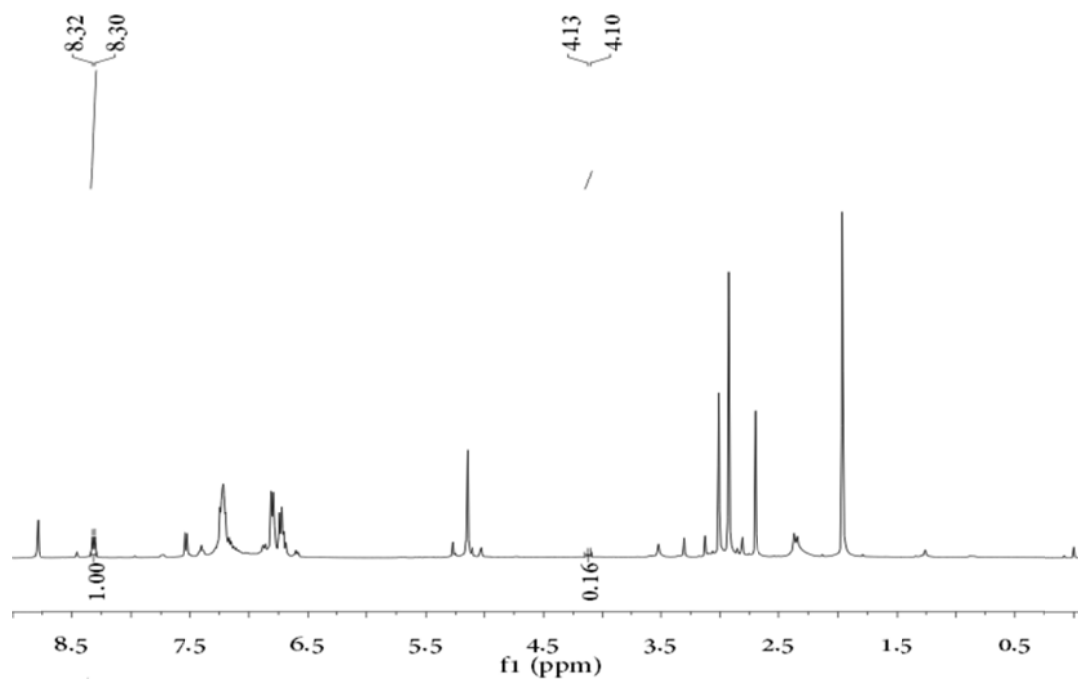

Fig. S13  $^1\text{H}$  NMR (Entry 9, Table 1).

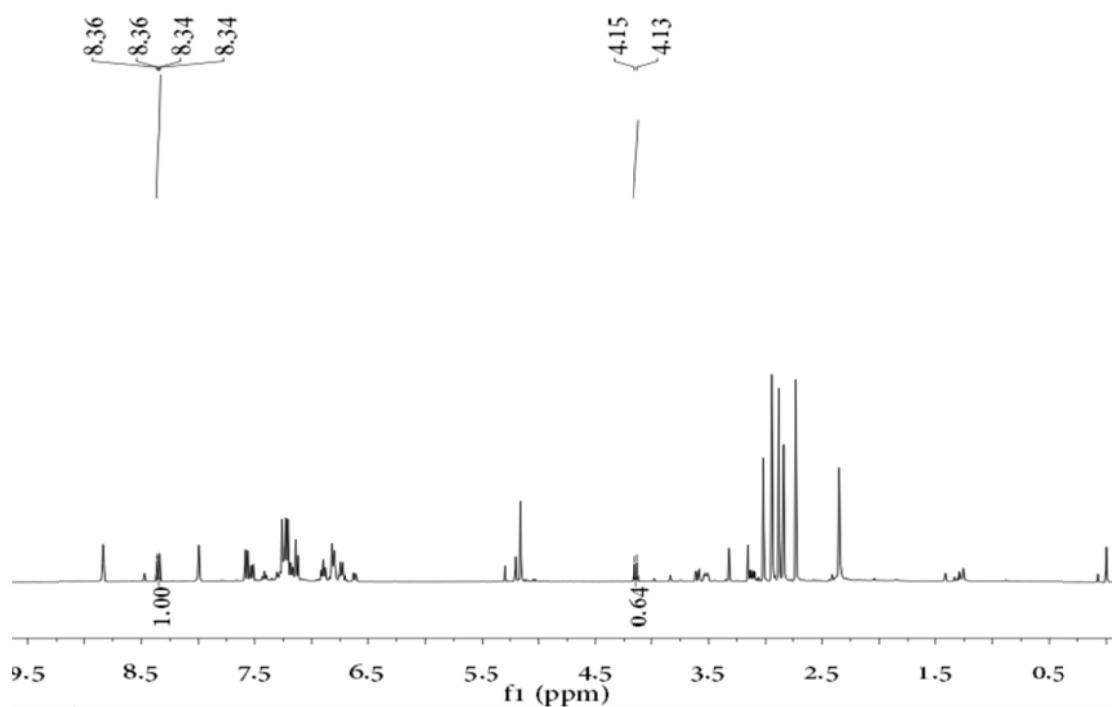

Fig. S14  $^1\text{H}$  NMR (Entry 1, Table S1).

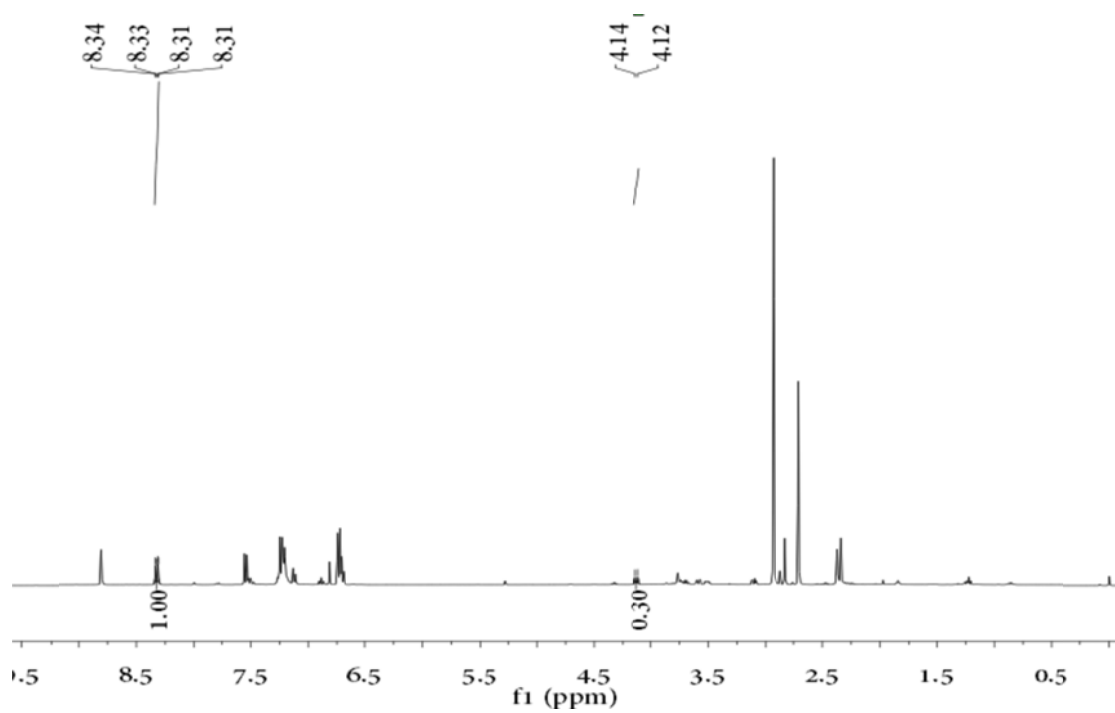

**Fig. S15** <sup>1</sup>H NMR (Entry 2, Table S1).

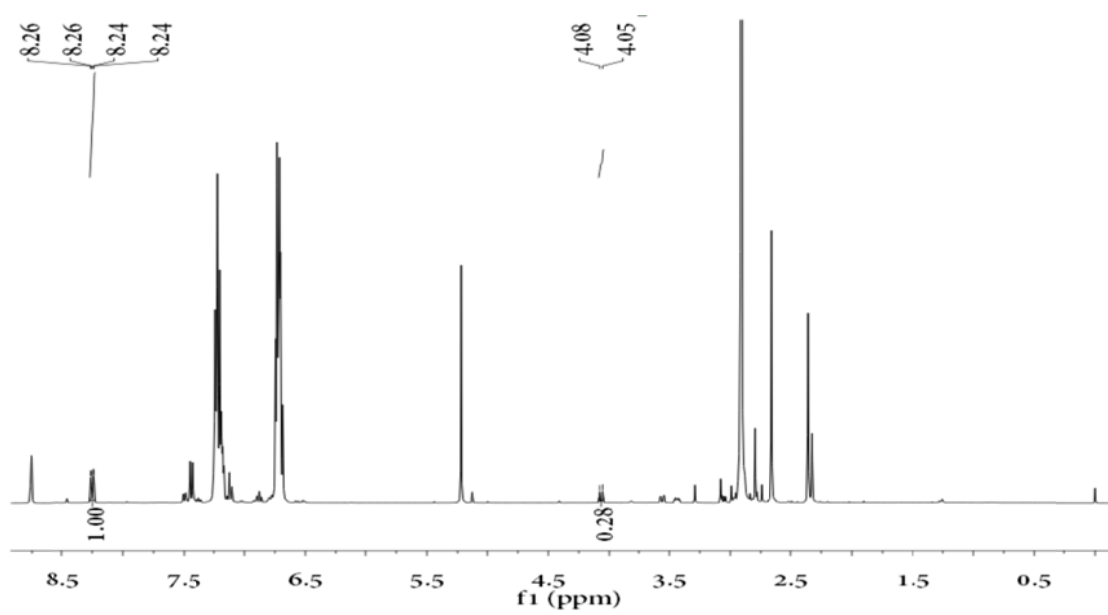

**Fig. S16** <sup>1</sup>H NMR (Entry 3, Table S1).

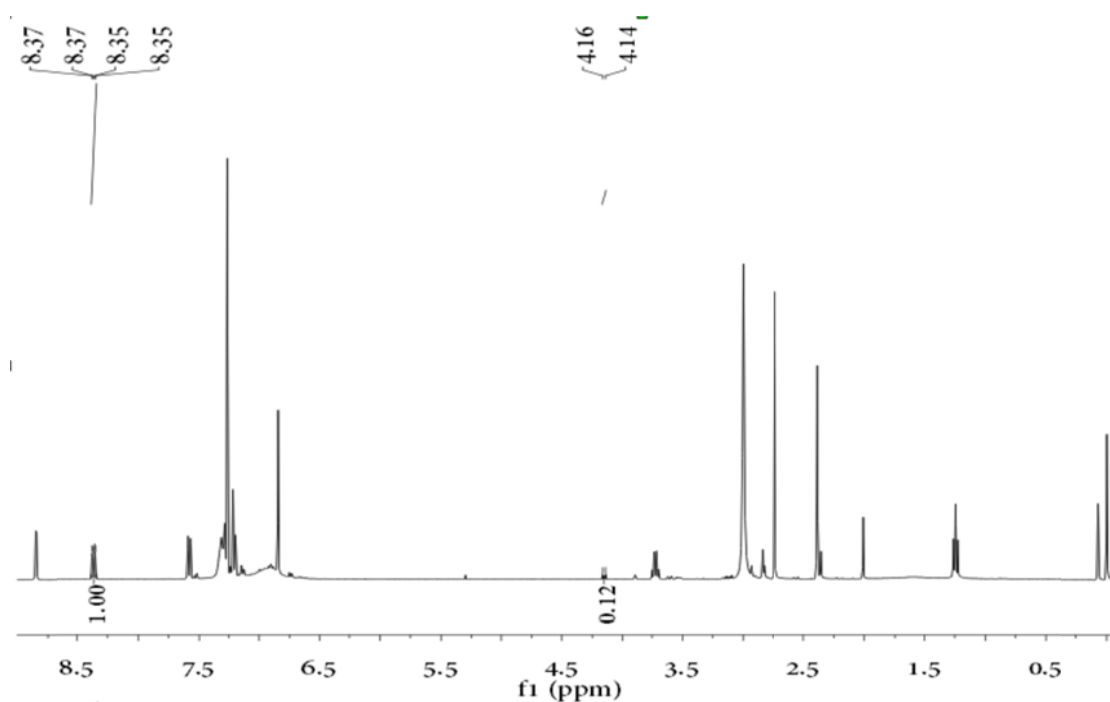

Fig. S17  $^1\text{H}$  NMR (Entry 4, Table S1).

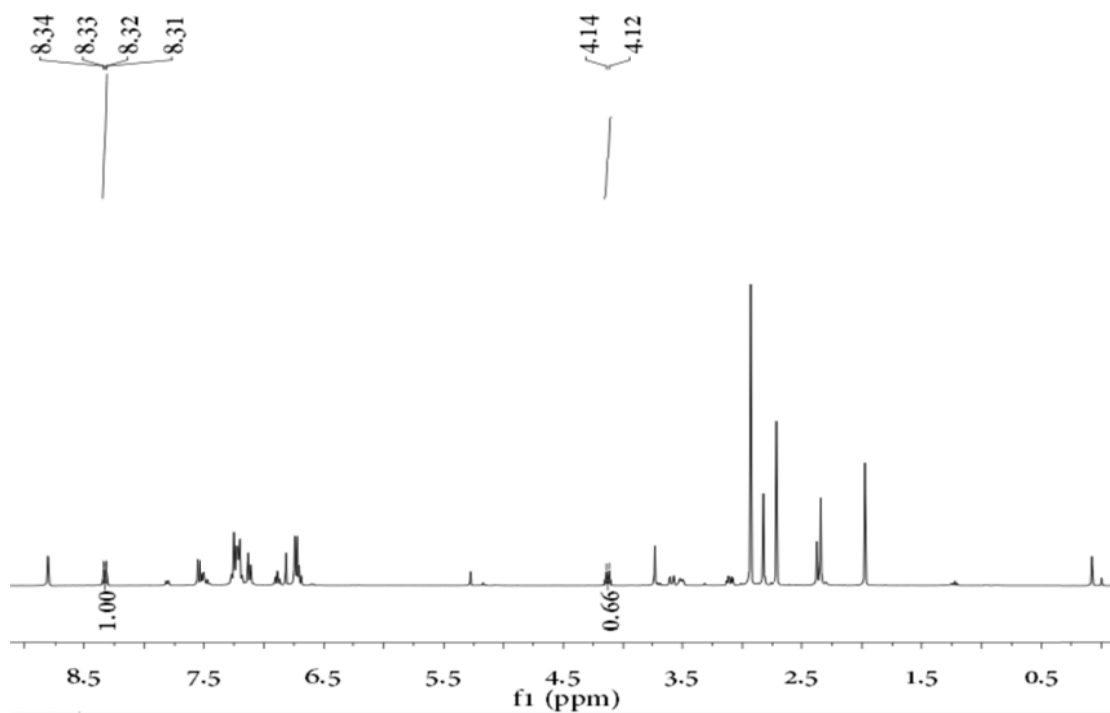

Fig. S18  $^1\text{H}$  NMR (Entry 5, Table S1).

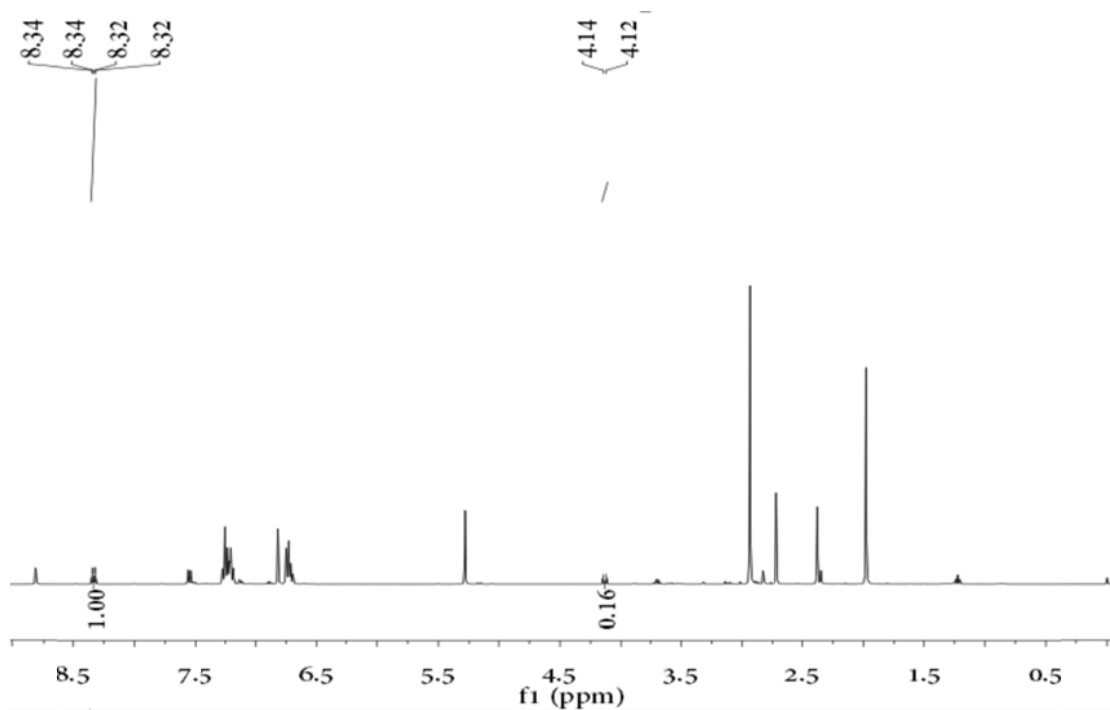

Fig. S19  $^1\text{H}$  NMR (Entry 6, Table S1).

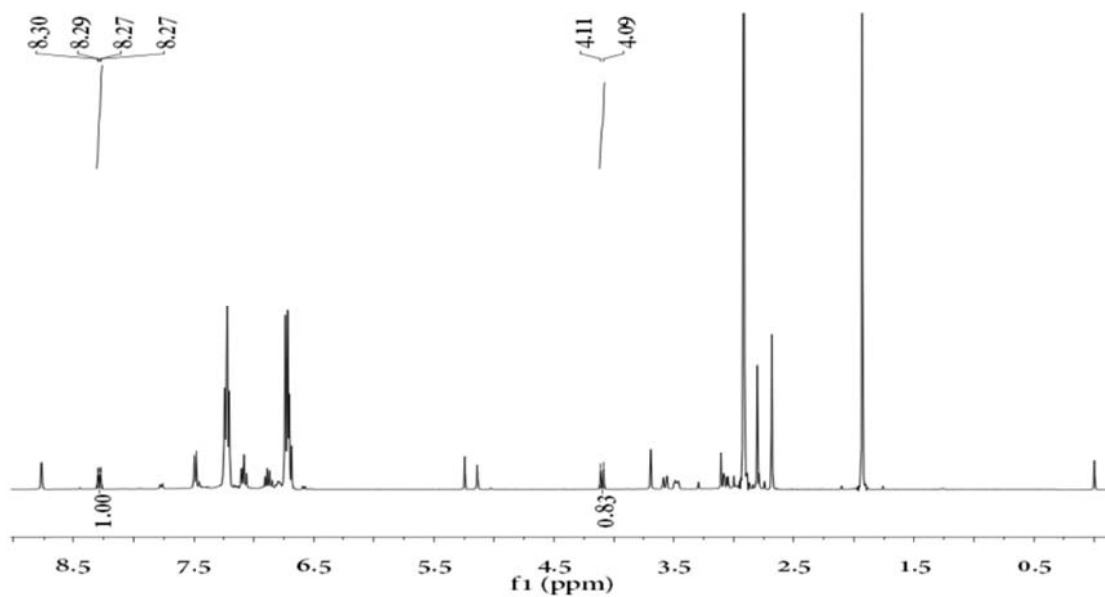

Fig. S20  $^1\text{H}$  NMR (3b, Table 2).

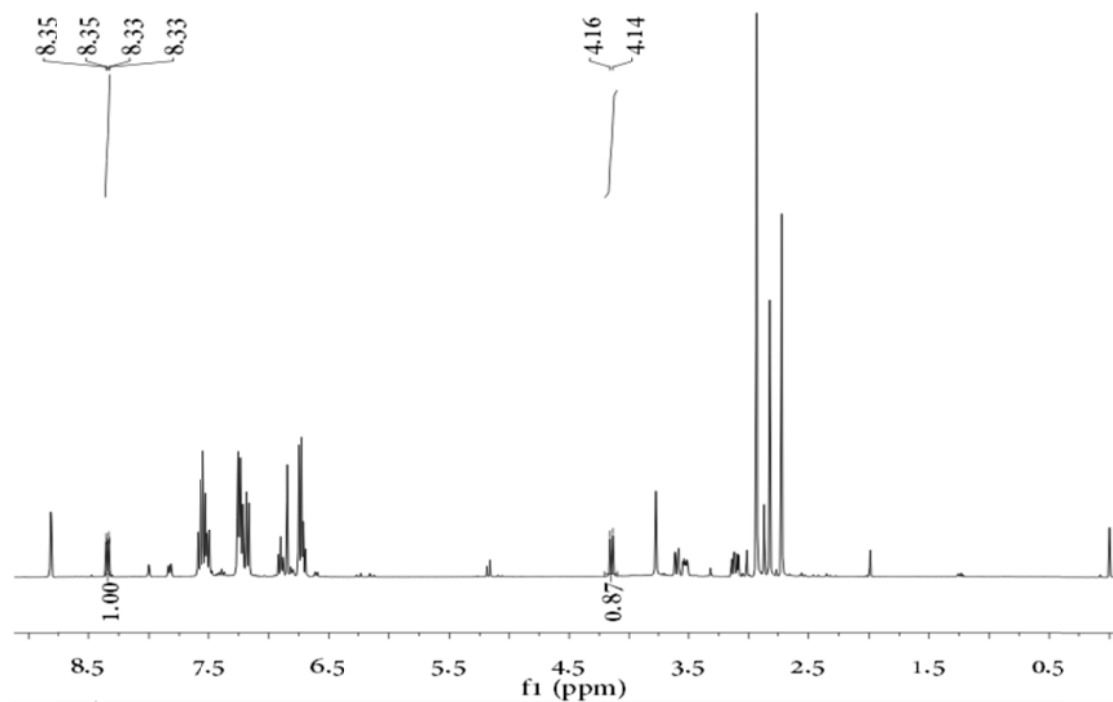

Fig. S21 <sup>1</sup>H NMR (3c, Table 2).

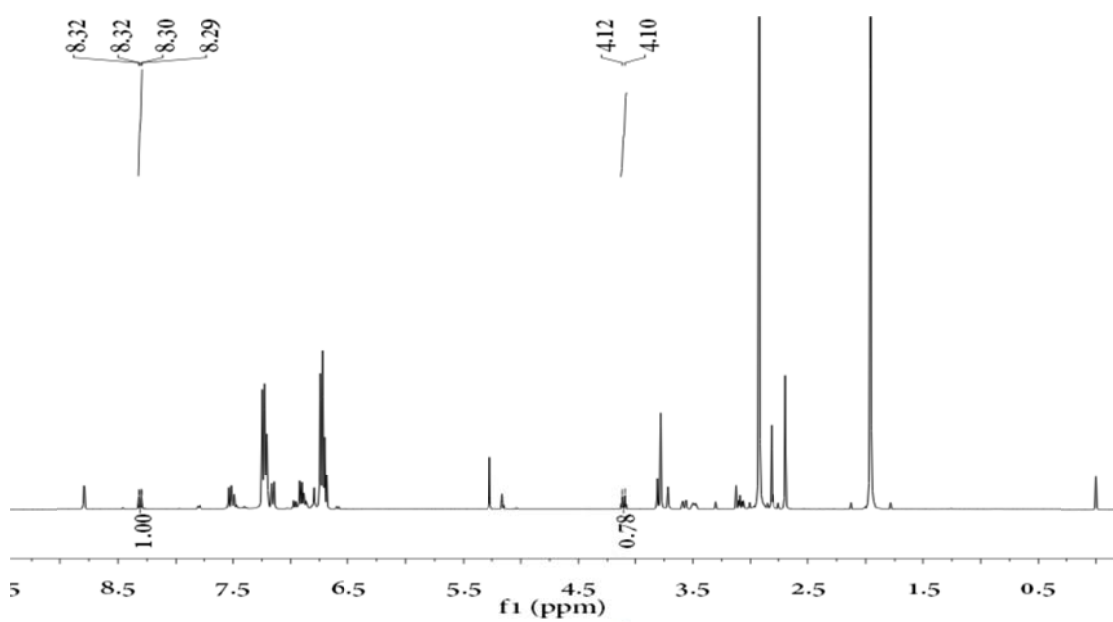

Fig. S22 <sup>1</sup>H NMR (3d, Table 2).

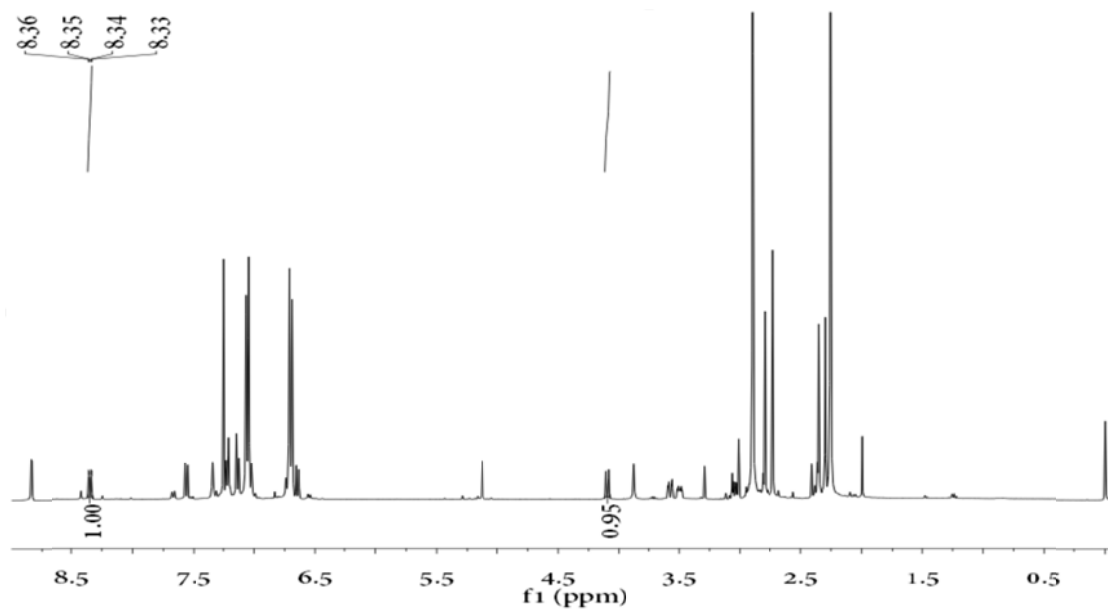

Fig. S23  $^1\text{H}$  NMR (3e, Table 2).

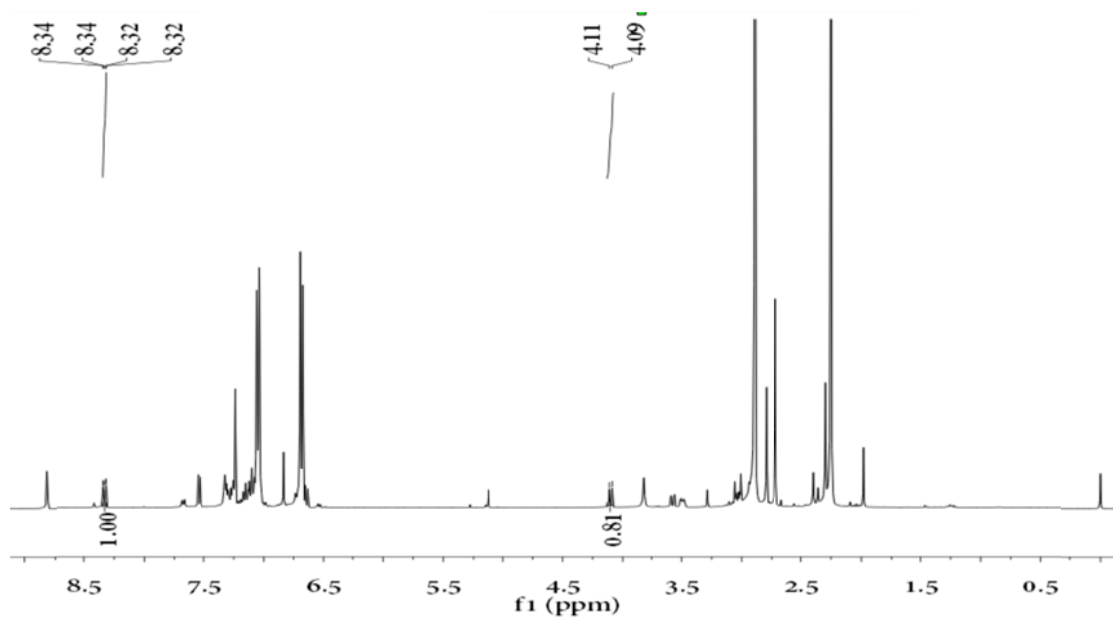

Fig. S24  $^1\text{H}$  NMR (3f, Table 2).

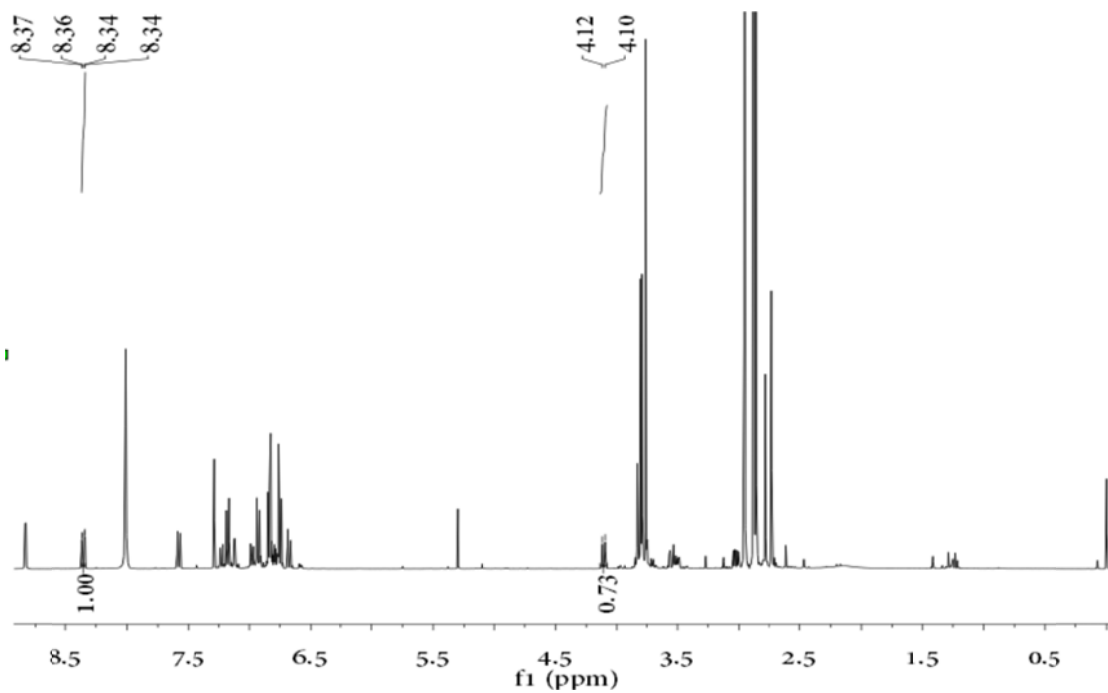

Fig. S25 <sup>1</sup>H NMR (3g, Table 2).

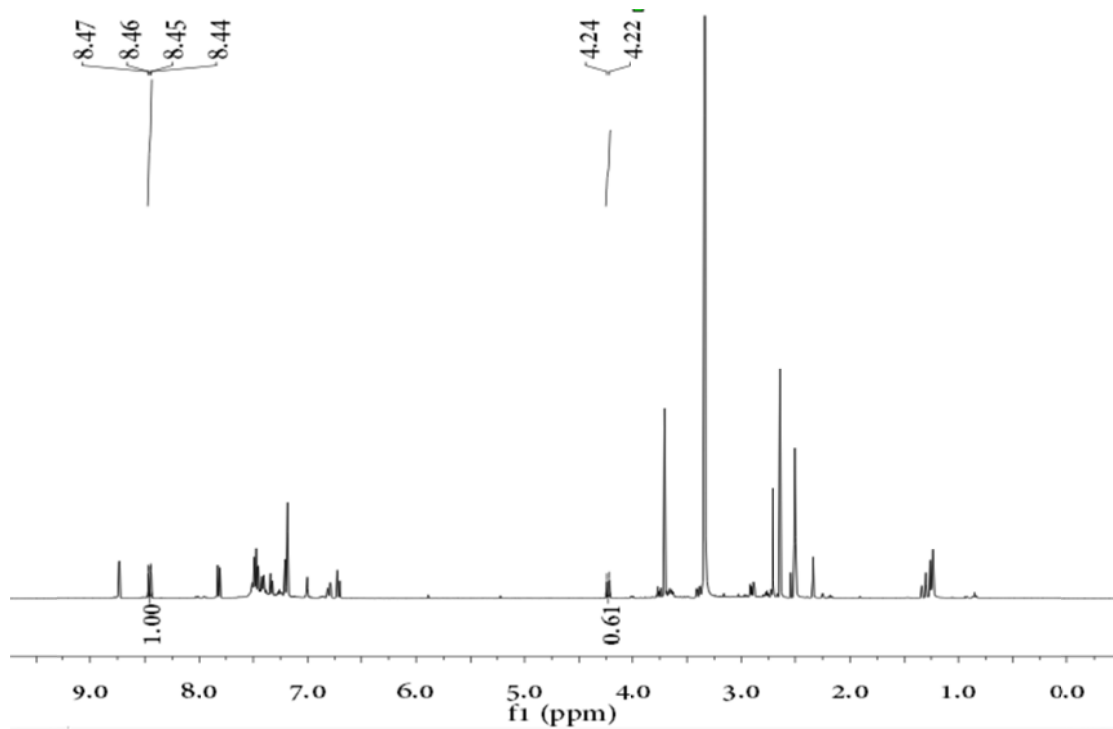

Fig. S26 <sup>1</sup>H NMR (3h, Table 2).



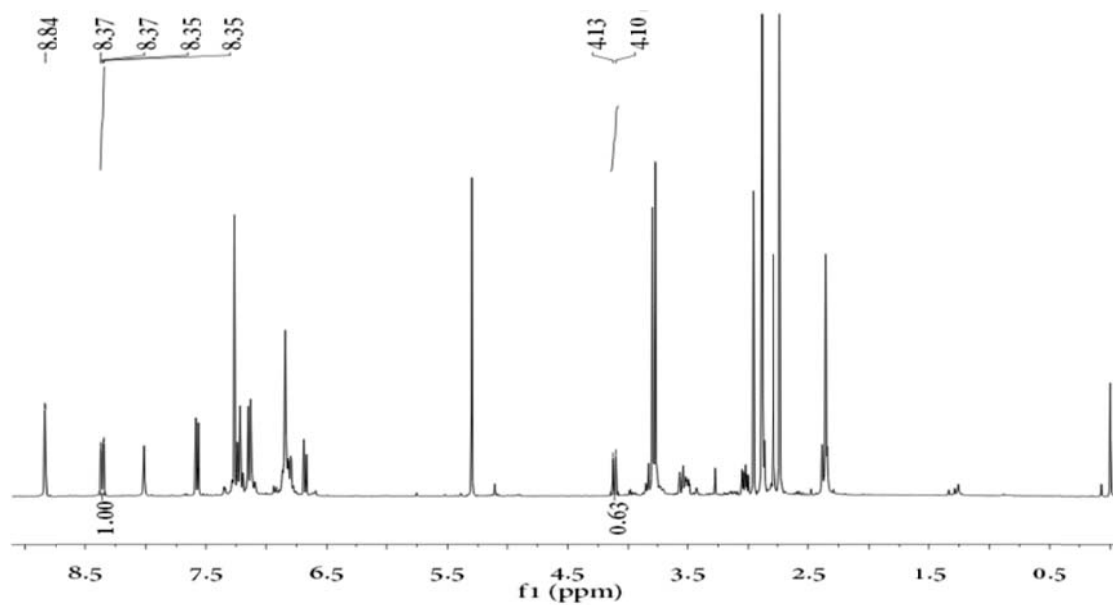

Fig. S27 <sup>1</sup>H NMR (3i, Table 2).

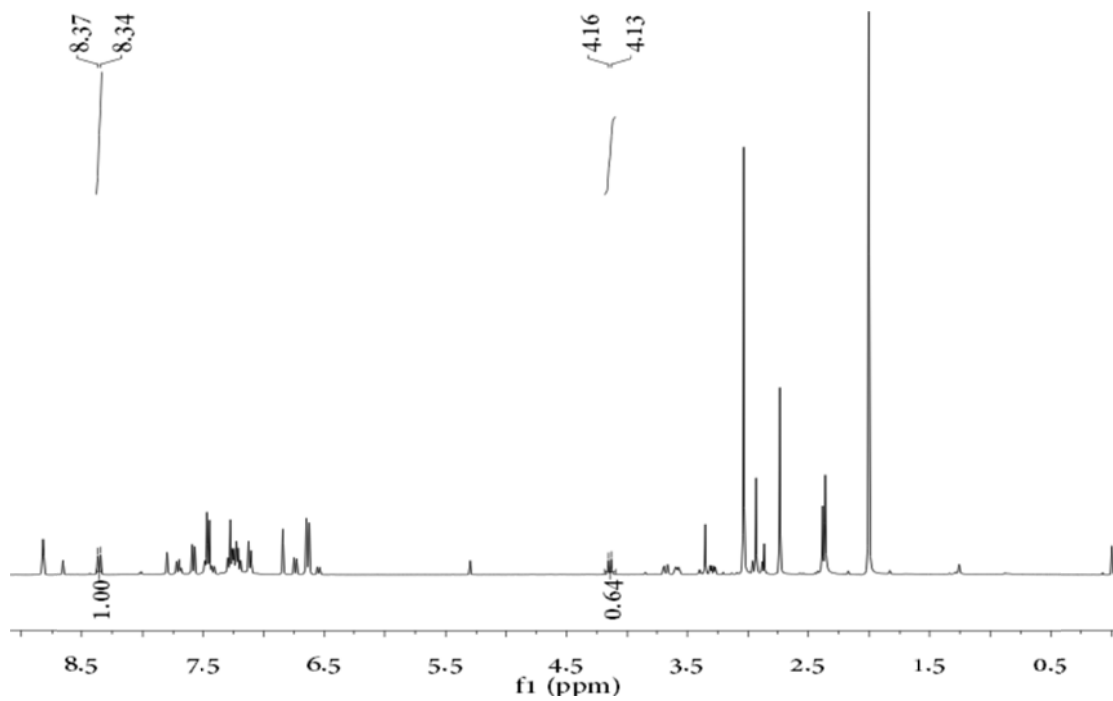

Fig. S28 <sup>1</sup>H NMR (3j, Table 2).

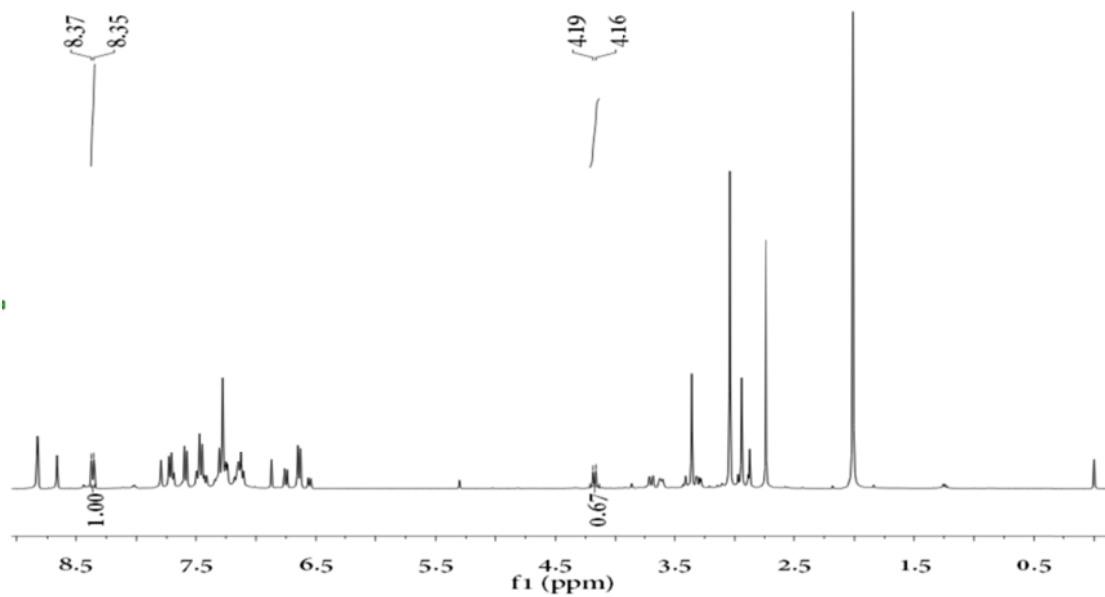

Fig. S29  $^1\text{H}$  NMR (3k, Table 2).

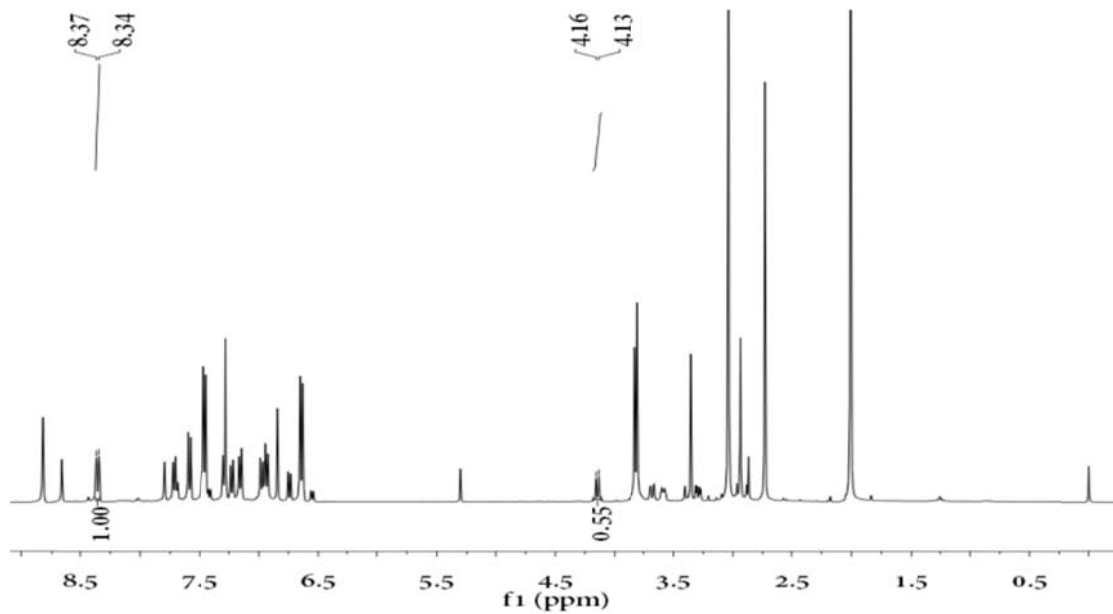

Fig. S30  $^1\text{H}$  NMR (3l, Table 2).

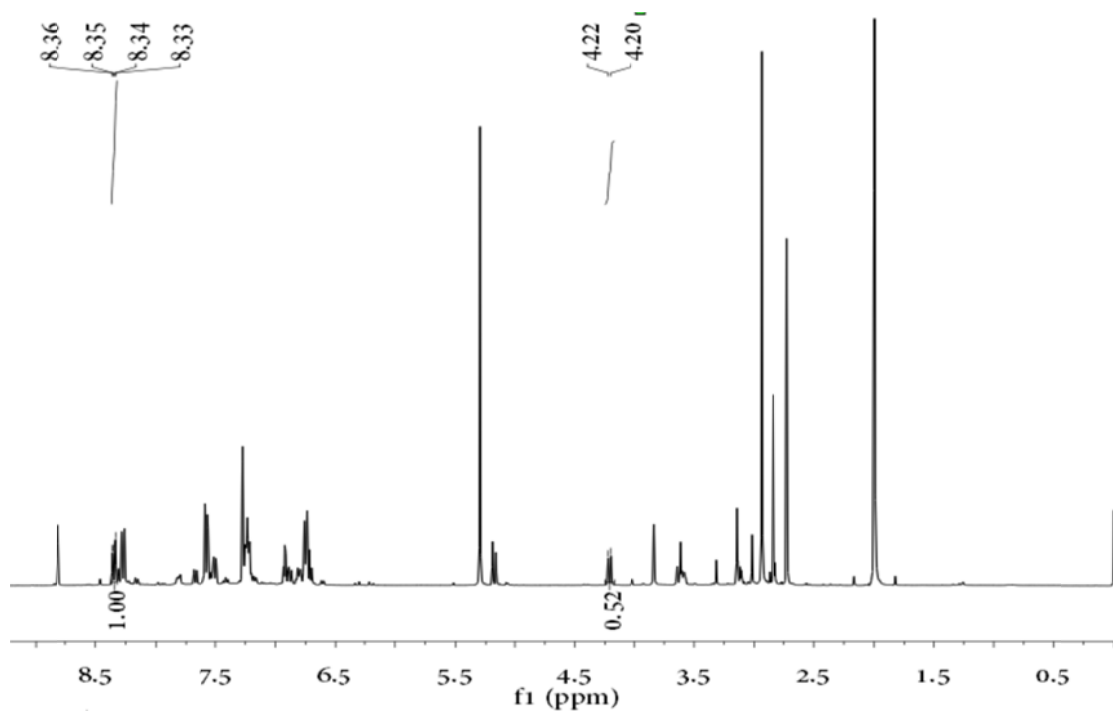

Fig. S31 <sup>1</sup>H NMR (3m, Table 2).

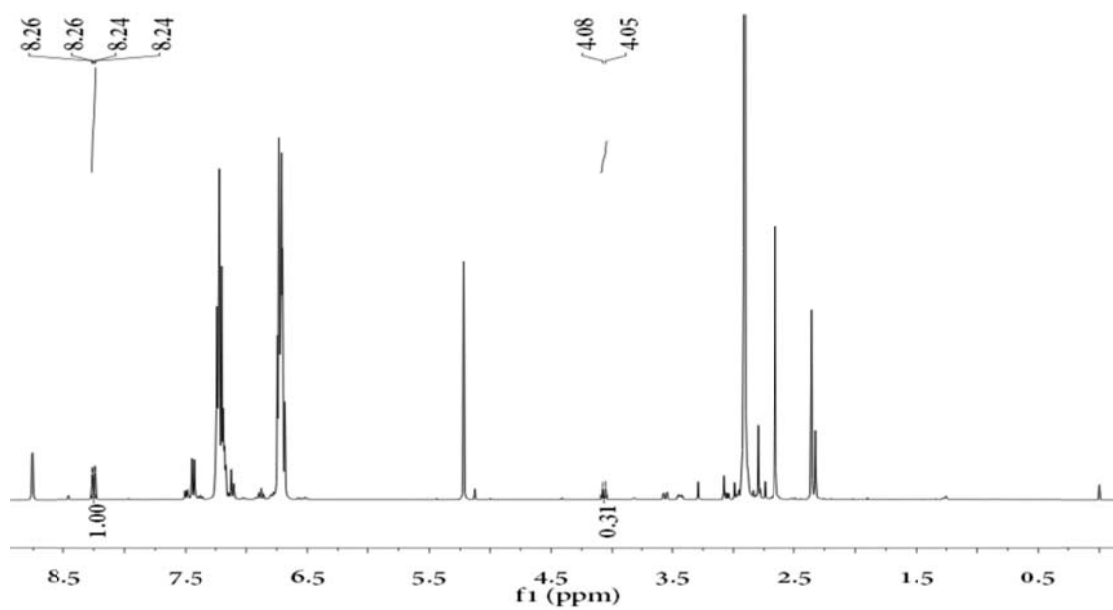

Fig. S32 <sup>1</sup>H NMR (3n, Table 2).

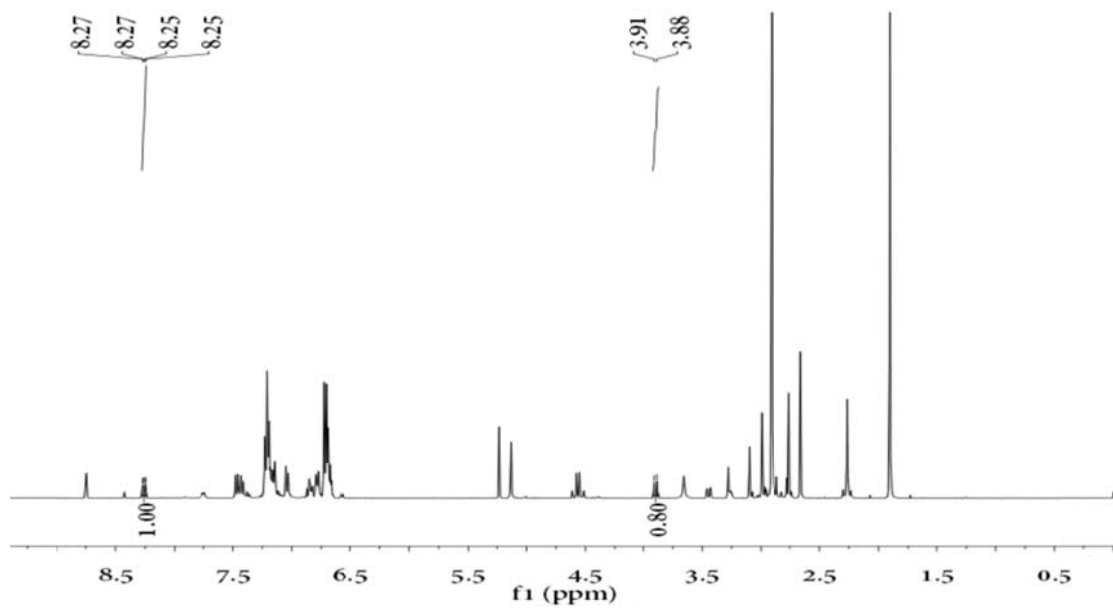

Fig. S33 <sup>1</sup>H NMR (3o, Table 2).

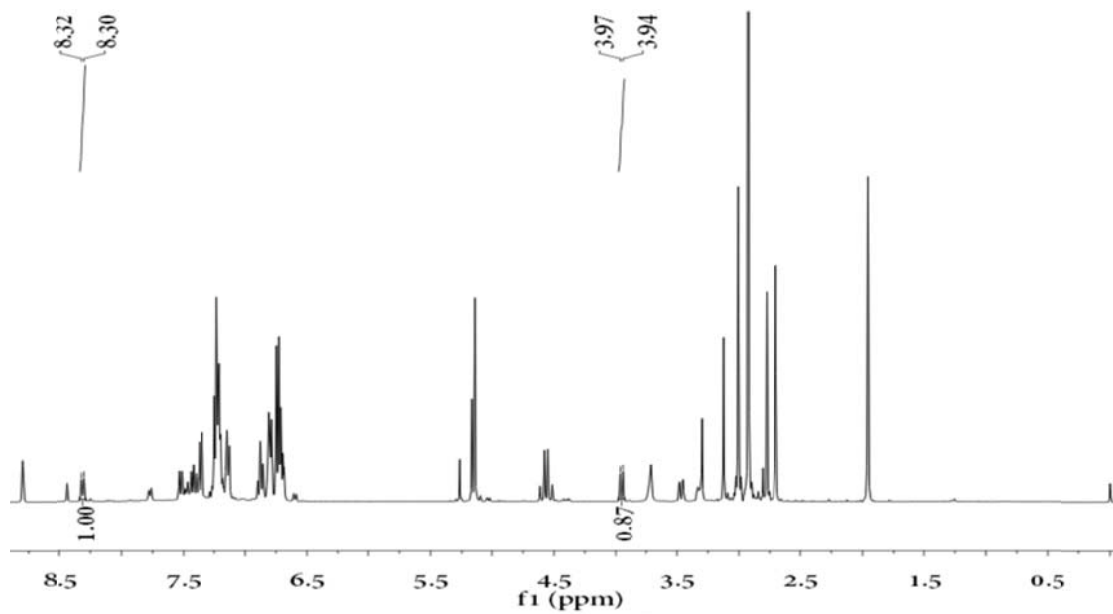

Fig. S34 <sup>1</sup>H NMR (3p, Table 2)
